# Supplementary material for: Novel RAB27A Variant Associated with Late-Onset Hemophagocytic Lymphohistiocytosis Alters Effector Protein Binding
Source: PubMed Central journal article supplement (PMC9700621; doi:10.1007/s10875-022-01315-4), 2022-07-23
Supplement: 10875_2022_1315_MOESM2_ESM.pdf [file 10875_2022_1315_MOESM2_ESM.pdf]

**SUPPLEMENTAL TABLES AND FIGURE LEGENDS**  
*Zondag, Torralba-Raga et al.*

**Supplemental Table 1. Genetics of the RAB27A-deficient patients used for lentiviral transduction**

| Patient | Gender | RAB27A variants                            | Diagnosis |
|---------|--------|--------------------------------------------|-----------|
| 1       | M      | Hmz c.514-518delCAAGC;<br>p.Gln172NfsX2    | GS2       |
| 2       | F      | Hmz c.514-518delCAAGC;<br>p.Gln172NfsX2    | GS2       |
| 3       | M      | Hmz c.148-149delAGinsC;<br>p.Arg50GlnfsX35 | GS2       |
| 4       | F      | Hmz c.514-518delCAAGC,<br>p.Gln171NfsX2    | GS2       |

**FIGURE LEGENDS**

**Sup. Fig. 1. Flow cytometry gating strategy for transduced CD8<sup>+</sup> T cells.** CD8<sup>+</sup> T cells from GS2 patients as well as healthy controls were isolated, transduced with lentiviruses encoding mCherry-tagged RAB27A constructs and then stimulated for evaluation of T cell receptor triggered degranulation. **(A)** Plots show the gating strategy for CD8<sup>+</sup> T cells from one representative patient. Plots to the right depict the transduction efficiency as revealed by mCherry expression for the RAB27A WT and p.R184Q constructs. **(B)** Plots show gating of CD8<sup>+</sup> T cells from GS2 patients based on mCherry expression (left column) and CD107a surface expression following anti-CD3 stimulation (right column) of cells transduced with RAB27A WT and p.R184Q constructs, respectively, from one representative GS2 patient. **(C)** Quantification of the frequency of mCherry<sup>+</sup> (high expression) CD8<sup>+</sup> T cells following lentiviral transduction of cells from four GS2 patients with different RAB27A constructs, as indicated. **(D)** Quantification of the MFI of mCherry<sup>+</sup> (high expression) CD8<sup>+</sup> T cells following lentiviral transduction of cells from four GS2 patients with different RAB27A constructs, as indicated.
